# Supplementary material for: A naphthalene-based fluorescent probe with a large Stokes shift for mitochondrial pH imaging
Source: Royal Society of Chemistry journal article supplement (doi:10.1039/c8an01371c), 2018-01-01
Supplement: c8an01371c1.pdf [file c8an01371c1.pdf]

## Electronic Supplementary Information for

# Naphthalene-based fluorescent probe with large Stokes shift for mitochondrial pH imaging

Bo Lin<sup>†a</sup>, Li Fan<sup>†b</sup>, Jinyin Ge<sup>a</sup>, Wenjia Zhang<sup>a</sup>, Caihong Zhang<sup>a</sup>, Chuan Dong<sup>b</sup>, Shaomin Shuang<sup>\*a</sup>

<sup>a</sup> *College of Chemistry and Chemical Engineering, Shanxi University, Taiyuan 030006, China.*

<sup>b</sup> *Institute of Environmental Science, Shanxi University, Taiyuan 030006, China.*

<sup>†</sup> *These authors contributed equally to this work.*

*E-mail: [smshuang@sxu.edu.cn](mailto:smshuang@sxu.edu.cn) (Shaomin Shuang);*

## **Table of Contents**

**Fig. S1 The excitation and emission spectra of probe**

**Fig. S2 The photostability of probe**

**Fig. S3 Cytotoxic effect of probe on HepG2 cells**

**<sup>1</sup>H-NMR, <sup>13</sup>C-NMR, MS and IR spectra of probe**

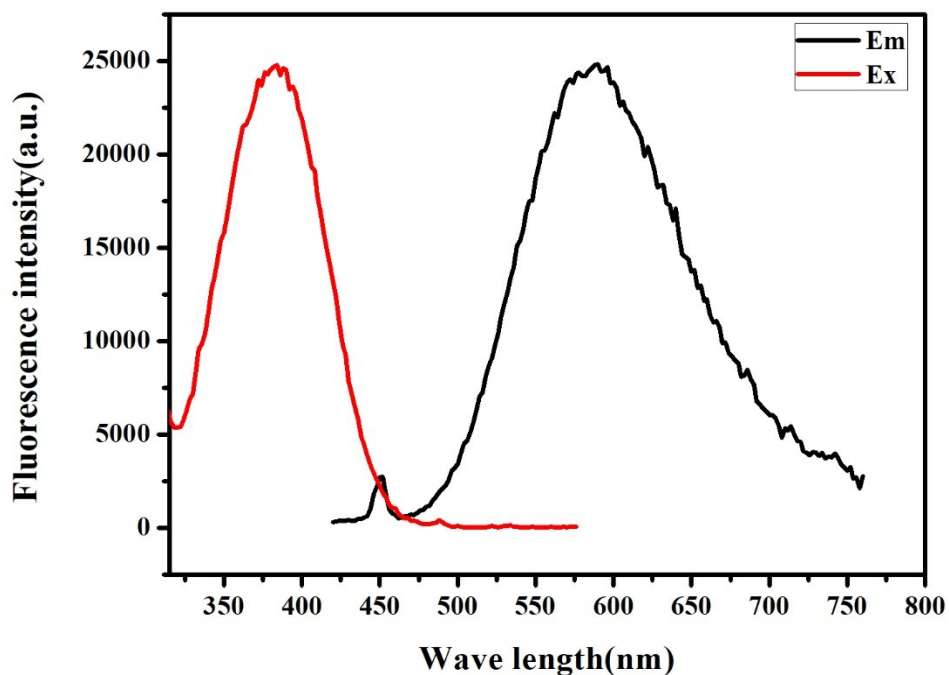

Fig. S1 The excitation and emission spectra of probe. The excitation wavelength was 390 nm in the emission spectrum and the emission spectrum was 586 nm in the excitation spectrum.

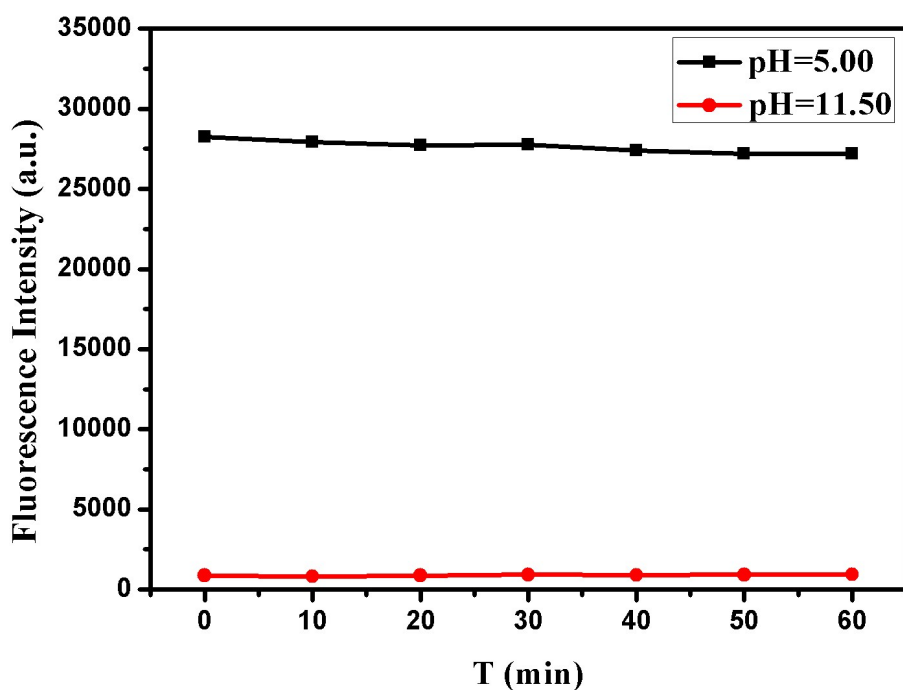

Fig. S2 Changes in fluorescence emission for probe with times at pH 5.00 and 11.50, respectively.

$\lambda_{\text{ex}} = 390 \text{ nm}$ . Excitation and emission bandwidths were both set at 2 nm.

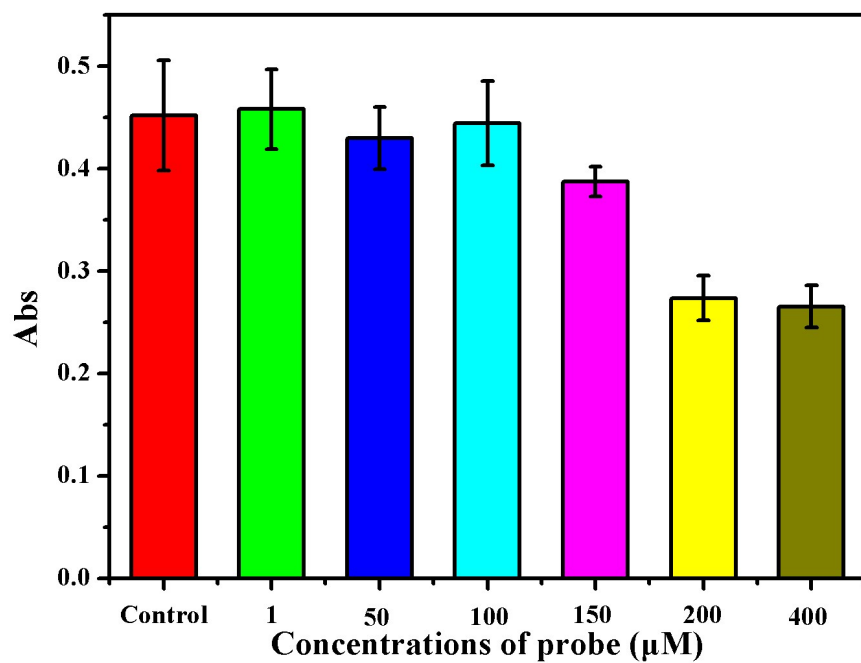

**Fig. S3** MTT assay of live HepG2 cells in the presence of probe of various concentrations.

**<sup>1</sup>H NMR, <sup>13</sup>C NMR and MS spectra analysis reports of BTVQ.**

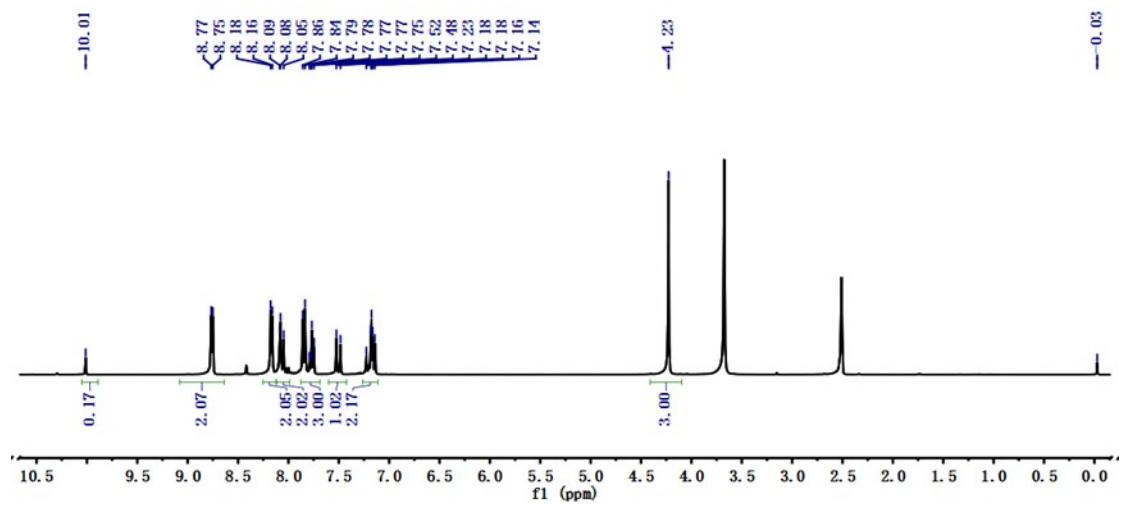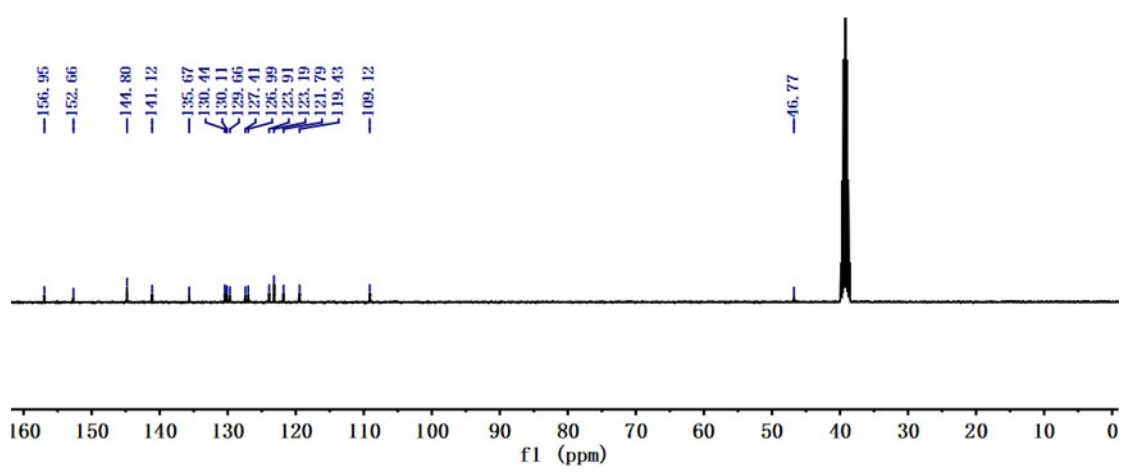

**HONG KONG BAPTIST UNIVERSITY, DEPARTMENT OF CHEMISTRY (MALDI-TOF)**

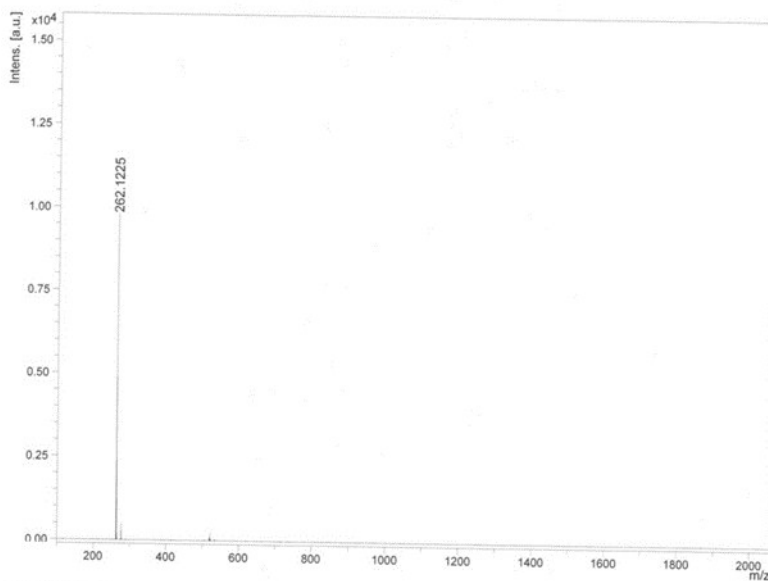

Date of acquisition 2016-10-05 16:13:28  
Comment 3 ERROR = -0.5379 PPM  
Instrument type autoflex  
Serial instrument number 25001.00216  
PIE delay in [ns] 60 msec  
Voltage polarity POS  
Comment 1 TRUE [M-] = 262.122641  
Comment 2 FOUND [M-] = 262.1225  
Laser repetition rate in Hz 20 psec  
Linear detector voltage 0  
Ion source voltage 1 19.040001  
Ion source voltage 2 17  
Ion source lens voltage 8.100000400000001  
Mass calibration Constant 1 728894.520866921  
Mass calibration Constant 2 136.535697068648  
Third calib constant -0.005727192711351261  
Number of shots 40

Acquisition method name D:\Methods\flexControlMethods\20140609\_johnRP\_PepMix\RP\_PepMix 1-4-2014\_from David\_LOM.par  
Sample name (file name prefix) LB-1-DHB0\_B18:1

printed: 10/05/2016 04:13:56  
PM
